# Supplementary material for: Selective synthesis of large diameter, highly conductive and high density single-walled carbon nanotubes by a thiophene-assisted chemical vapor deposition method on transparent substrates
Source: Royal Society of Chemistry journal article supplement (doi:10.1039/c6nr03642b), 2016-01-01
Supplement: c6nr03642b1.pdf [file c6nr03642b1.pdf]

Electronic Supplementary Information

Selective Synthesis of Large Diameter, Highly Conductive and  
High Density Single-Walled Carbon Nanotubes by Thiophene-  
Assisted Chemical Vapor Deposition Method on Transparent  
Substrates

Jinghua Li,<sup>a</sup> Keigo Otsuka,<sup>a, b</sup> Xiao Zhang,<sup>a</sup> Shigeo Maruyama,<sup>b</sup> and Jie Liu<sup>\*a</sup>

<sup>a</sup> Department of Chemistry, Duke University, Durham, NC 27708, United States

Email: [j.liu@duke.edu](mailto:j.liu@duke.edu)

<sup>b</sup> Department of Mechanical Engineering, the University of Tokyo, 7-3-1 Hongo, Bunkyo-ku,  
Tokyo 113-8656, Japan.

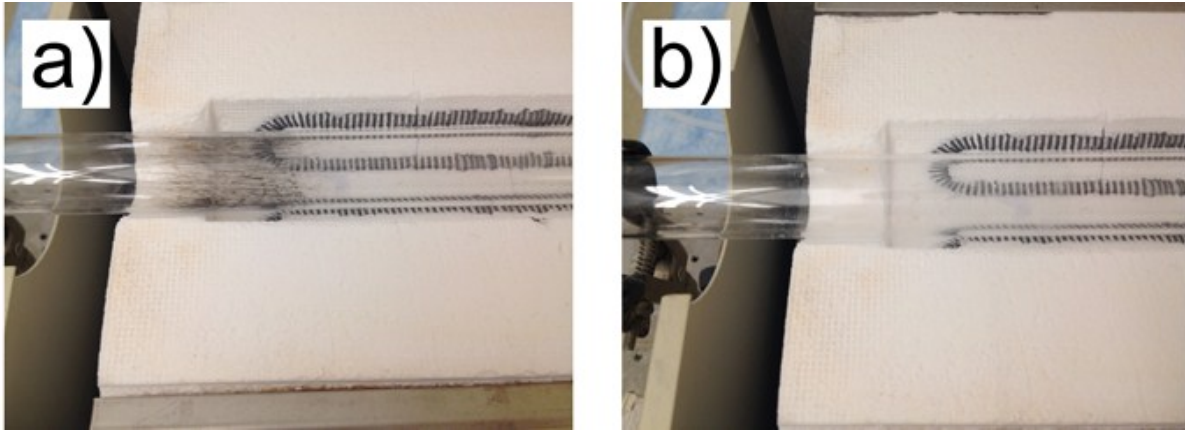

**Fig. S1.** Downstream of the quartz tube after SWNT growth using thiophene-assisted method (a) and normal CVD method (b).

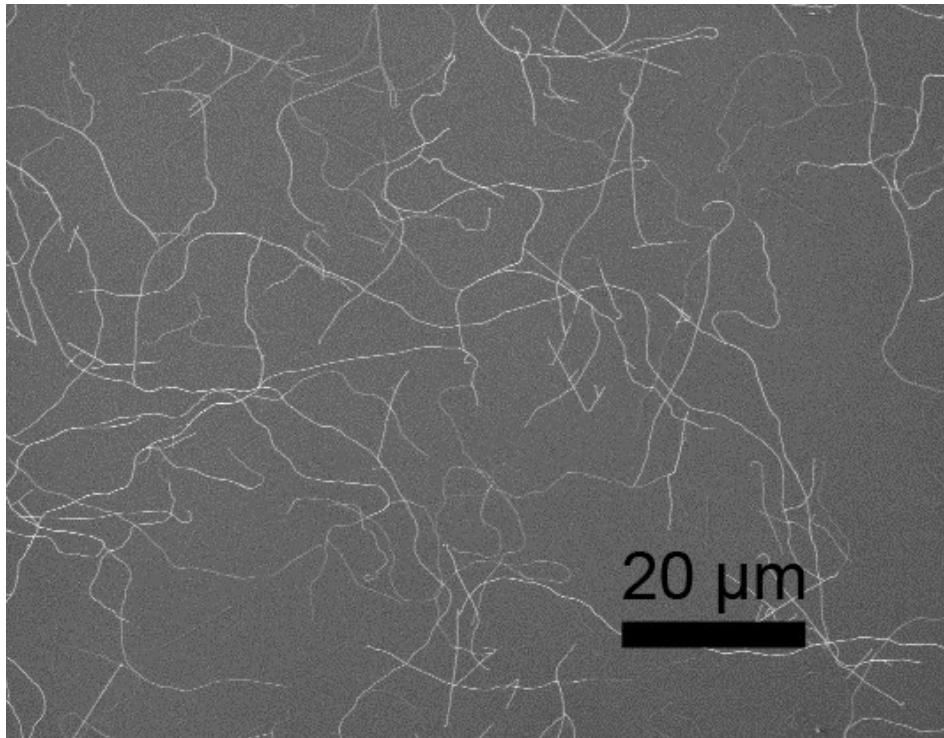

**Fig. S2.** SEM image of SWNTs prepared under the same growth condition as in Fig. 1b but without thiophene.

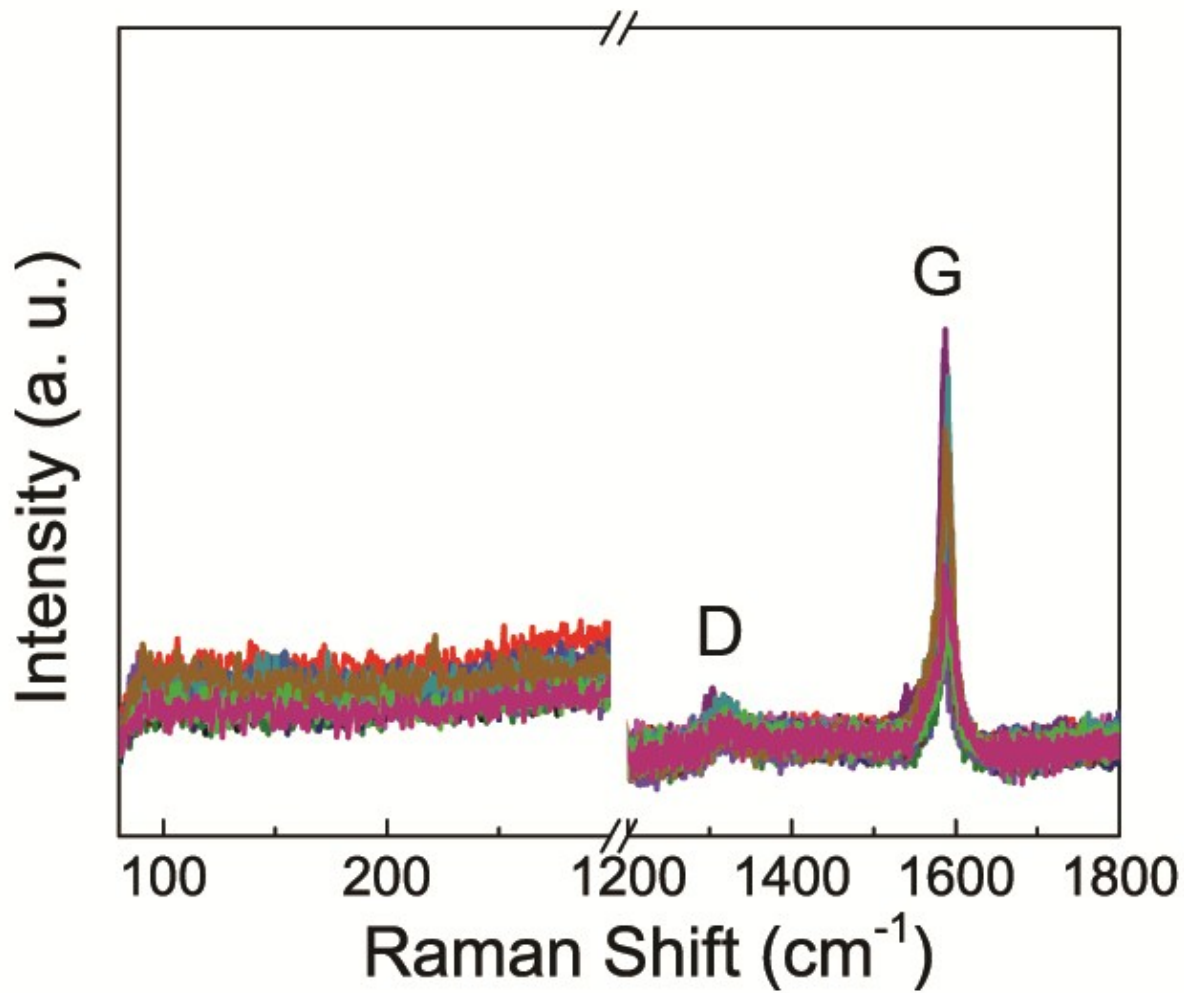

**Fig. S3.** Raman spectra collected from individual SWNTs showing D bands and G bands. The excitation laser wavelength is 633 nm.

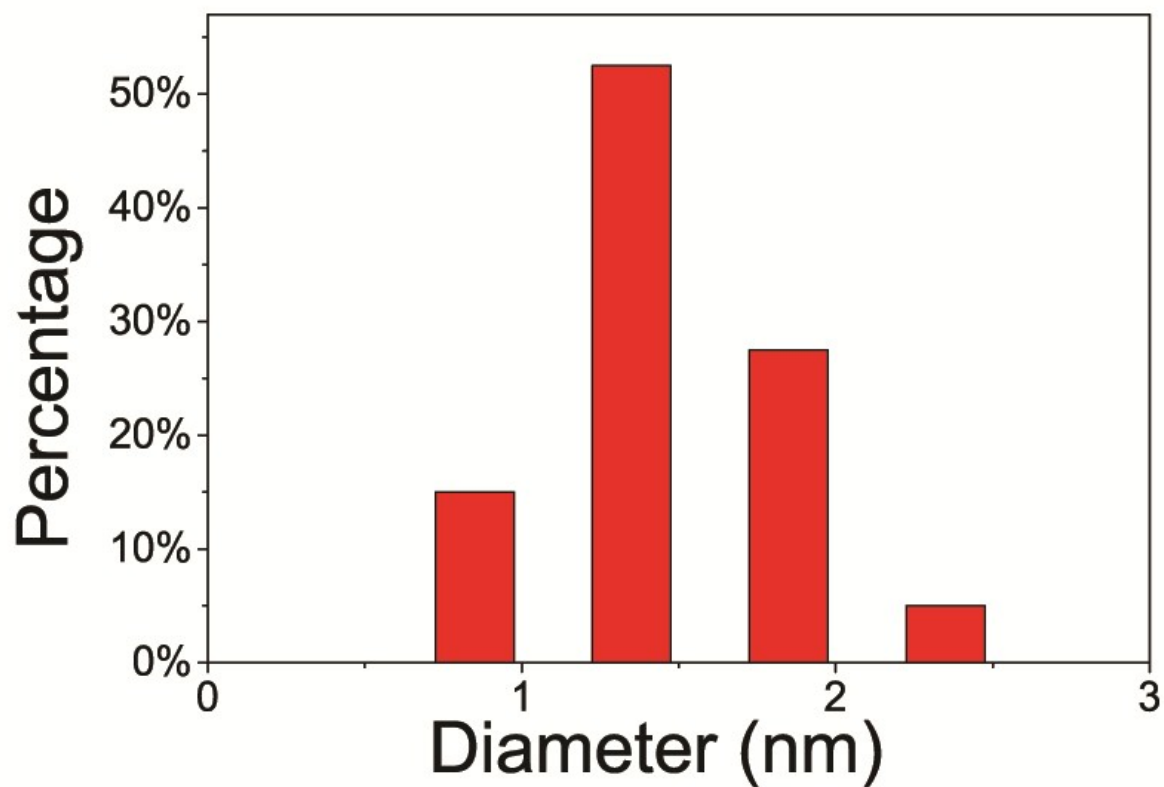

**Fig. S4.** Diameter distribution of SWNTs synthesized under the same growth condition as in Fig. 3c but without thiophene. The average and standard deviation are 1.43 and 0.34 nm, respectively.

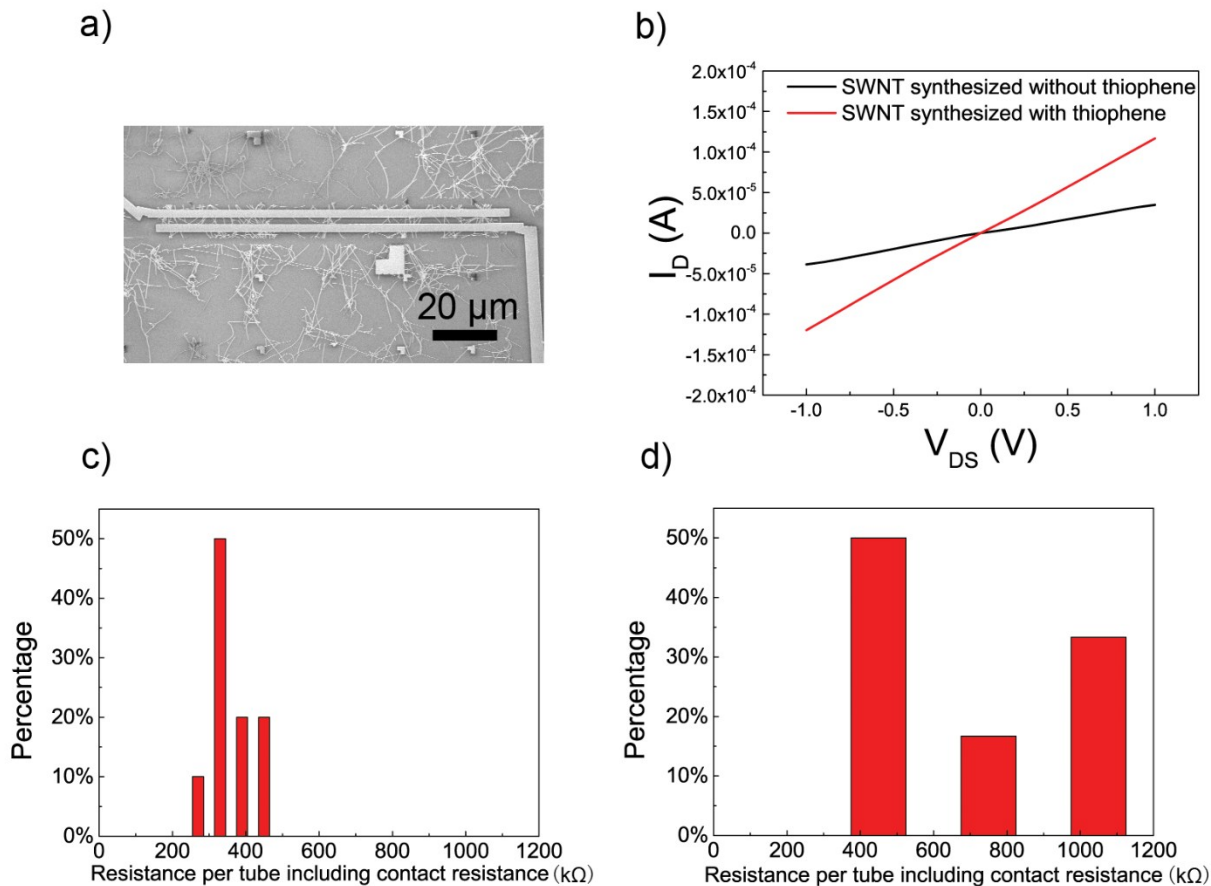

**Fig. S5.** (a) SEM image of a representative multi-SWNT device with the channel length of 2  $\mu\text{m}$ . (b) Output characteristics of two representative devices based SWNT prepared by the normal CVD method (red) and the thiophene-assisted CVD method. The two devices contain the same number of SWNTs. (c, d) Histograms of the per-tube resistance (including contact resistance) distribution of devices based on SWNTs made by the thiophene-assisted CVD method (c) and the normal CVD method without thiophene.

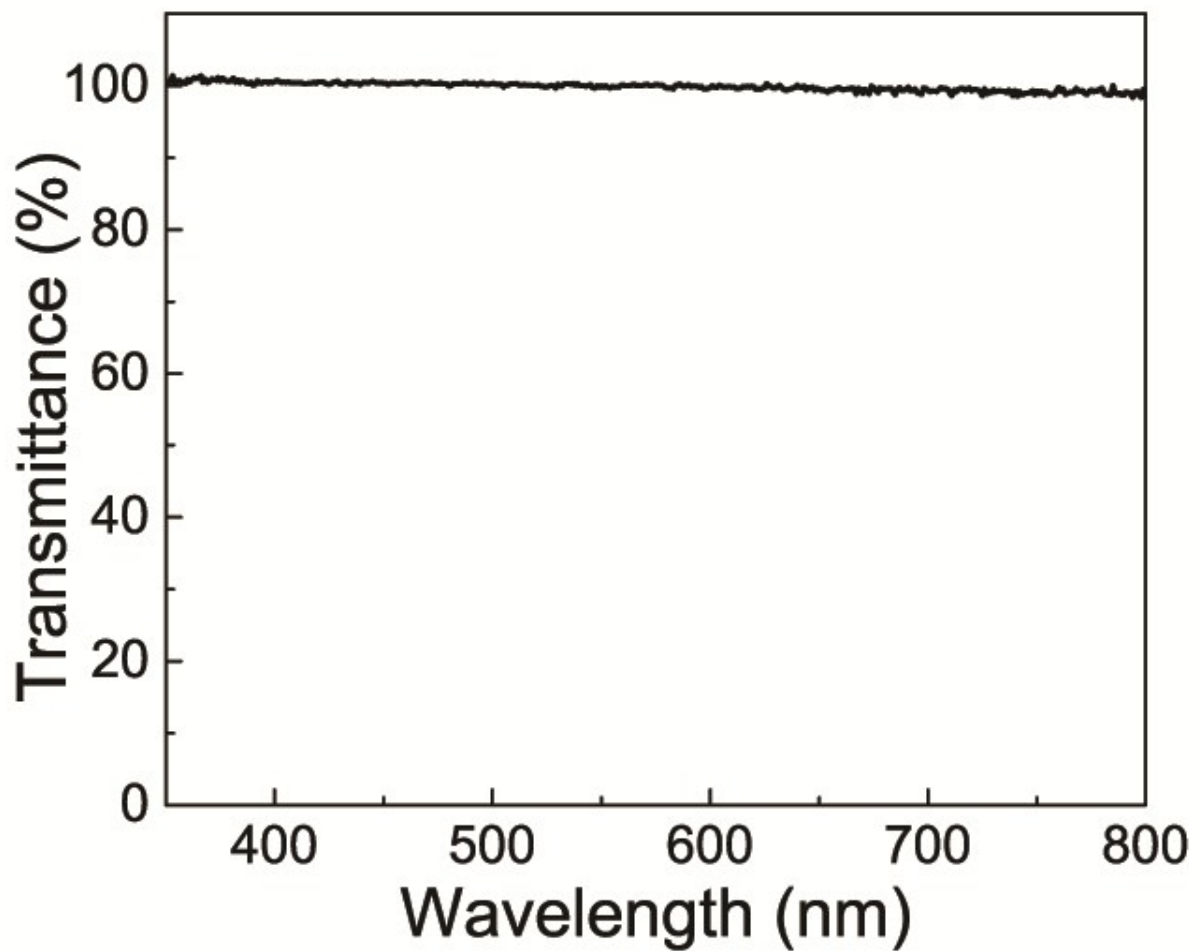

**Fig. S6.** Optical transmittance spectrum of SWNT thin film prepared by thiophene-assisted CVD method after the multi-cycle growth. A blank substrate was used as the reference.
